## 26 **Abstract**

27 Ability to tolerate low salinity is a key factor affecting the distribution of the Chinese  
28 shrimp (*Fenneropenaeus chinensis*). Although previous studies have investigated the  
29 mechanisms underlying adaptations to low salinity in some crustaceans, little is  
30 known about low-salinity adaptations in *F. chinensis*, particularly at the molecular  
31 level. Here, to identify genes potentially associated with the molecular response of *F.*  
32 *chinensis* to low-salinity exposure, we compared the transcriptomes of *F. chinensis* in  
33 low-salinity (5 ppt) and normal-salinity (20 ppt) environments. In total, 45,297,936  
34 and 44,685,728 clean reads were acquired from the low-salinity and control groups,  
35 respectively. De novo assembly of the clean reads yielded 159,130 unigenes, with an  
36 average length of 662.82 bp. Of these unigenes, only a small fraction (10.5% on  
37 average) were successfully annotated against six databases. We identified 3,658  
38 differentially expressed genes (DEGs) between the low-salinity group and the control  
39 group: 1,755 DEGs were downregulated in the low-salinity group as compared to the  
40 control, and 1,903 were upregulated. Of these DEGs, 282 were significantly  
41 overrepresented in 38 KEGG (Kyoto Encyclopedia of Genes and Genomes) pathways.  
42 Notably, several DEGs were associated with pathways important for osmoregulation,  
43 including the mineral absorption pathway (*ATPIA*, Sodium/potassium-transporting  
44 ATPase subunit alpha; *CLCN2*, Chloride channel 2; *HMOX2*, Heme oxygenase 2;  
45 *SLC40A1/FPN1*, Solute carrier family 40 iron-regulated transporter, member 1), the  
46 vasopressin-regulated water reabsorption pathway (*AQP4*, Aquaporin-4; *VAMP2*,  
47 Vesicle-associated membrane protein 2; *RAB5*, Ras-related protein Rab-5) and the

48 ribosome pathway. Our results help to clarify the molecular basis of low-salinity  
49 adaptations in *F. chinensis*.

50 **Key words:** *ATP1A*; *AQP4*; Mineral absorption; Vasopressin-regulated water  
51 reabsorption

## 52 **Introduction**

53 To improve the low-salinity aquaculture of marine crustaceans, it is necessary to  
54 understand their adaptation ability to low salinity and mechanisms used by these  
55 organisms to tolerate low-salinity environments. As osmoregulators, some euryhaline  
56 marine and brackish crustaceans have a strong ability to adapt to environments with  
57 varying salinities (from almost 0 ppt up to 40 ppt) [1-4]. This ability to tolerate low  
58 salinity is a key factor affecting the distribution of such crustaceans in low-salinity  
59 environments [5-6].

60 Previous studies have explored the mechanisms underlying low-salinity tolerance  
61 in mariculture crustaceans at the organismal, cellular, and molecular levels [1, 7-10].  
62 In general, the most common adaptive strategies for hyperosmoregulation aim to  
63 maintain hemolymph osmolarity above that of the ambient medium, both via salt  
64 absorption and via permeability reduction (i.e., reducing or limiting water inflow) [3].  
65 However, most euryhaline crustaceans produce isosmotic urine, and thus considerable  
66 salt is lost in low-salinity environments [11-12]. Studies of low-salinity tolerance in  
67 crustaceans have shown that the gills also participate in osmoregulation. In detailed  
68 reviews, Péqueux (1995) and Henry (2012) assessed the specialized functions of gills  
69 and gill parts in various crustaceans and showed that both cuticle permeability and the

70 membrane characteristics of the salt-transporting gill epithelial cells were critical to  
71 osmoregulation [1, 3]. Some bio-molecules in the gill epithelial cells facilitate salt  
72 absorption and may also inhibit of water inflow, possibly compensating for passive  
73 salt loss and water gain; these biomolecules include Na<sup>+</sup>/K<sup>+</sup>-ATPase, K<sup>+</sup> channels, Cl<sup>-</sup>  
74 channels, carbonic anhydrase, aquaporins (AQPs), and various exchangers (Na<sup>+</sup>/NH<sub>4</sub><sup>+</sup>,  
75 Na<sup>+</sup>/H<sup>+</sup>, and Cl<sup>-</sup>/HCO<sub>3</sub><sup>-</sup>) [3, 5, 13-16].

76 The mechanisms underlying low-salinity adaptations in crustaceans have been  
77 investigated with respect to salt absorption [1, 3]. However, although the  
78 water-permeability of epithelial cells is known to change rapidly based on the  
79 properties of some AQPs [17-18], the regulation of water inflow in invertebrates  
80 (particularly crustaceans) by AQPs remains unclear [16, 19]. During osmoregulation,  
81 it is also important to determine how energy is distributed in response to low salinity;  
82 various invertebrates have been shown to consume more energy during  
83 osmoregulation [1, 3].

84 The euryhaline Chinese shrimp (*Fenneropenaeus chinensis*), which has an  
85 isosmotic point of 25 ppt, is naturally distributed primarily in the Chinese Yellow Sea,  
86 the Bohai Sea, and along the western coast of the Korean Peninsula [20-21]. It is an  
87 important commercial shrimp along the coasts of China and Korea [20]. As these  
88 shrimp are cultured in much lower salinity (under the isosmotic point), they must  
89 manage or tolerate substantial changes in water osmolality. In crustaceans similarly  
90 exposed to salinity stress (e.g., the swimming crab, *Portunus trituberculatus*; the  
91 Chinese crab, *Eriocheir sinensis*; and the Pacific white shrimp, *Penaeus vannamei*),

92 several genes in pathways potentially associated with adaptations to low salinity have  
93 been reported [22-25]. Reports showed that *F. chinensis* has a poorer ability to  
94 maintain a stable hemolymph osmolarity (reflecting the weaker low-salinity  
95 adaptation), compared to *P. vannamei* [21, 26]. The poorer ability limits the farming  
96 development of *F. chinensis*. However, to date, studies on low-salinity adaptation in *F.*  
97 *chinensis* are still lacking on molecules. Recently Li (2019b) reported on *F. chinensis*  
98 that the group after exposure at low salinity (10 ppt) showed significantly elevated  
99 citrate synthase (CS) and cytochrome C oxidase (COX) activities in its gill when  
100 compared with the group subjected to 20 ppt salinity condition [21]. For this species,  
101 these proteins have also included Na<sup>+</sup>/K<sup>+</sup>-ATPase, phenoloxidase (PO), heat shock  
102 proteins (HSPs), ion-transport enzymes [27-29].

103 In addition, here, we hypothesize that several other proteins, including channel  
104 transporters, AQPs, and proteins associated with energy consumption, are involved in  
105 low-salinity resistance in *F. chinensis*. To test this hypothesis, we aimed to use  
106 transcriptome analysis to identify and annotate the genes differentially expressed in *F.*  
107 *chinensis* exposed to low-salinity conditions, and to explore the molecular pathways  
108 associated with osmoregulation or energy consumption that were overrepresented in  
109 these genes. Our results will clarify the mechanisms underlying low-salinity tolerance  
110 in *F. chinensis* and further help to explain the adaptation ability during  
111 osmoregulation in this species.

## 112 **Materials and Methods**

### 113 **Sample collection and treatment**

114 Live shrimp were obtained from a local market near their farm of origin (in  
115 Lianyungang, N 34°48'52.47", E 119°12'19.08"). Shrimp were transported to our  
116 laboratory at Lianyungang Normal College. Before experimentation, all shrimp were  
117 acclimated to a salinity of 20 ppt at 25°C for 5 days. This salinity was similar to the  
118 natural isosmotic point of this species (25 ppt) [20, 30], as well as to the salinity at the  
119 shrimp farm (23 ppt). At late stage of the acclimation period, survival rates were  
120 consistently high. We then randomly divided the shrimp into two groups (n = 20 per  
121 group) by two 22 L (liters) of transparent plastic tanks: the low-salinity group (LS)  
122 was exposed to low salinity levels (5 ppt) for 24 h, while the control group remained  
123 at 20 ppt salinity as salinities ranging from 20 to 32 ppt are considered optimal  
124 survival rates [20]. *F. chinensis* in this salinity range (20 to 32 ppt) should suffer less  
125 salinity stress. In the study, salinity was maintained using sea salt and pure water and  
126 measured by a portable salinity meter (Arcevoos® ST6). In each tank, 15 L of water  
127 was used and one-third of it was replaced every 12 hours (7:00-19:00). At the end of  
128 the 24 h experimental period, the gills of three randomly selected surviving  
129 individuals per group (mean body length: 9.13 ± 0.47 cm; mean body weight 5.13 ±  
130 0.65 g) were harvested and stored at -70°C for transcriptome and real-time  
131 quantitative PCR (RT-qPCR) analysis.

## 132 **RNA isolation, library construction, and sequencing**

133 Total RNA was extracted using TRIzol reagent (Invitrogen Corp., USA). RNA  
134 concentration was measured using a NanoDrop 2000 spectrophotometer (Thermo  
135 Scientific, USA), and RNA integrity was assessed using 1.5% agarose gel

136 electrophoresis. Magnetic oligo (dT) beads were used to isolate mRNA from total  
137 RNA. The mRNA was then fragmented into fragments approximately 200 bp long  
138 using fragmentation buffer (Tris-acetate, KOAc, and MgOAc) at 94°C for 35 min.  
139 The fragmented mRNA was used to construct the cDNA libraries. At least 5 µl of  
140 mRNA solution ( $\geq 200$  ng/µl) was used to construct each library. Sequencing libraries  
141 for each sample were generated using the TruSeq RNA Sample Prep Kit (Illumina,  
142 USA). Libraries were paired-end sequenced using a HiSeq X Ten platform (Illumina,  
143 USA). The read length was 200bp.

## 144 **Transcriptome assembly and unigene annotation**

145 Raw sequence data were processed using FastqStat.jar V1.0 [31], with default  
146 parameters. We then used Cutadapt v1.16 (<http://cutadapt.readthedocs.io>; [32]) with  
147 parameters -q 20 -m 20 to clean the raw sequence data by deleting adapter sequences,  
148 deleting poly-N sequences, trimming low-quality sequence ends ( $<Q20$ ), deleting  
149 sequences with N ratios  $>10\%$ , and removing reads less than 25 bp long. We used  
150 Trinity (<http://trinityrnaseq.github.io>; [33]) to assemble the clean reads. Subsequently,  
151 paired-end reads were used to fill the gaps when sequence scaffolds could not be  
152 extended on either end. These sequences were defined as transcripts and were  
153 subsequently assembled into unigenes based on clustering patterns using Corset [24,  
154 34].

155 The identified unigenes were annotated against six databases: NCBI  
156 nonredundant protein sequences (NR), Protein Families (PFAM), Search Tool for the  
157 Retrieval of Interacting Genes (STRING), KEGG (Kyoto Encyclopedia of Genes and

158 Genomes) Ortholog (KO), Gene Ontology (GO), and SWISS-PROT. We searched the  
159 unigenes against these databases using BlastX v2.2.25 [35] with a cutoff E-value of  
160  $10^{-5}$ . Functional unigenes were classified based on GO terms using Blast2GO  
161 (<http://www.blast2go.com/b2ghome>) [36].

## 162 **Identification and enrichment of differentially expressed** 163 **unigenes (DEGs)**

164 We used Kallisto v0.43.1 (<http://kallisto.com>) to evaluate the expression levels of  
165 the unigenes based on transcripts per kilobase million (TPM) values; higher TPM  
166 values reflect higher levels of unigene expression [37]. We used edgeR v3.24 to  
167 identify unigenes where  $|\log_2 \text{fold-change (FC)}|$  was  $>1$  and the false discovery rate  
168 (FDR) was  $<0.05$  [38-39]; these unigenes were considered DEGs. We then identified  
169 the KEGG pathways significantly enriched in the DEGs ( $P < 0.05$ ) using  
170 hypergeometric test [40].

## 171 **Verification of DEGs using RT-qPCR**

172 We selected four RNA-Seq DEGs (three upregulated and one downregulated) for  
173 RT-qPCR validation, which belong to the significant pathways (Glycine, serine and  
174 threonine metabolism, Mineral absorption and Glycolysis/Gluconeogenesis). We used  
175 the  *$\beta$ -actin* gene as the internal reference gene, against which to normalize the  
176 expression levels of the target genes. Gene-specific primers were designed based on  
177 sequences derived from the transcriptome assembly and annotation using Primer  
178 Premier 5.0 [41] (Table 1). Each RT-qPCR (25  $\mu$ l) contained 12.5  $\mu$ l of  $2 \times$  SYBR  
179 qPCR Mix, 1  $\mu$ l each of forward and reverse primers, 1  $\mu$ l of cDNA, and 10.5  $\mu$ l of



180 RNase-free H<sub>2</sub>O. RT-qPCRs were performed on an Applied Biosystems 7500  
181 Real-time PCR system (Applied Biosystems, Thermo Fisher Scientific, Waltham,  
182 MA, USA), with the following cycling conditions: an initial denaturation step of 3  
183 min at 95°C; 40 cycles of 15 s at 94°C, 15 s at 55°C, and 25 s at 72°C; and a standard  
184 dissociation cycle. Three technical replicates were performed per gene, and the 2-  
185  $\Delta\Delta$ CT method [42] was used to calculate relative expression levels. We considered  
186 genes differentially expressed between groups if  $|\log_2FC|$  was  $>1$  and the FDR was  
187  $<0.05$ .

188

189 **Table 1. Primers used for real-time quantitative PCR.**

190

| Gene name                       | Forward primer sequence (5'-3') | Reverse primer sequence (5'-3') |
|---------------------------------|---------------------------------|---------------------------------|
| <i><math>\beta</math>-actin</i> | GCGAGAAATCGTGCGT<br>GAC         | AGGGTGCGAGGGCAGT<br>GAT         |
| <i>ATP1A</i>                    | AGAAGGCCGATATTGG<br>TG          | CAGGGATGTTAGATGTC<br>AGG        |
| <i>CLCN2</i>                    | AACAACACCCATTGCC<br>TCAC        | TCCACCAACTCCCAGAC<br>G          |
| <i>HK</i>                       | GCAGACGCAGTTGACG<br>AT          | ACTCCTTGGCGAGACCT<br>T          |
| <i>glyA</i>                     | ACAAATCTGCCCTGAA<br>TC          | CCTTGA ACTCTGCGTCT<br>C         |

191

## 192 **Results**

### 193 **Sequence quality and de novo assembly**

194 After filtering the raw reads, we obtained 45,297,936 clean reads for group LS  
195 and 44,685,728 for the control group. Base call accuracy was acceptable based on  
196 Q20 values, which correspond to a 99% accuracy rate for each nucleotide base (i.e., A,

197 C, T and G) in a sequence ([43]: 97.64% and 97.16% of the bases in the LS and  
198 control groups, respectively, had quality scores >20 (Q20) (Table 2). De novo  
199 assembly yielded 211,955 transcripts and 159,130 unigenes. The average lengths of  
200 the transcripts and unigenes were 1,028.64 bp and 662.82 bp, respectively. The N50  
201 values (length of the smallest transcript/unigene in the set that contains the fewest  
202 (largest) transcripts/unigenes whose combined length represents at least 50% of the  
203 assembly) [44] for the transcripts and unigenes were 2,503 bp and 1,004 bp,  
204 respectively (Table 3). The raw data have been uploaded to SRA database and the  
205 BioProject ID is PRJNA669213.

206

207

**Table 2. Clean-read statistics.**

208

| Group             | Total reads | Total bases   | Error% | Q20%  | GC%   |
|-------------------|-------------|---------------|--------|-------|-------|
| Low-salinity (LS) | 45,297,936  | 6,725,104,745 | 0.03   | 97.14 | 45.99 |
| Control           | 44,685,728  | 6,634,797,034 | 0.03   | 97.16 | 47.40 |

209

210

**Table 3. De novo assembly statistics.**

| Type                | Unigenes    | Transcripts |
|---------------------|-------------|-------------|
| Total sequence num  | 159,130     | 211,955     |
| Total sequence base | 105,474,756 | 218,024,931 |
| Percent GC          | 42.42       | 43.36       |
| Largest (bp)        | 38,633      | 38,633      |
| Smallest (bp)       | 201         | 186         |
| Average (bp)        | 662.82      | 1028.64     |
| N50                 | 1,004       | 2,503       |
| N90                 | 269         | 341         |

211

## 212 **Annotation and classification of the transcriptome**

213 We were able to annotate only a small fraction of the 159,130 unigenes against  
214 the six databases (10.50% on average). The greatest proportion of unigenes (13.99%;  
215 22,256 unigenes) was annotated against the NR database, followed by the STRING  
216 and SWISS-PROT databases (10.89% and 10.94%, respectively; Table 4). GO  
217 analysis of the annotated unigenes showed that, in the biological process category, the  
218 three terms annotated in the most unigenes were macromolecule metabolic process  
219 (10,578 unigenes), organonitrogen compound metabolic process (10,297 unigenes),  
220 and regulation of cellular process (9,871 unigenes); in the cellular components  
221 category, the three terms annotated in the most unigenes were intracellular (14,934  
222 unigenes), intracellular part (14,883 unigenes), and cytoplasm (14,078 unigenes); and  
223 in the molecular function category, the three terms annotated in the most unigenes  
224 were cation binding (5,800 unigenes), nucleic acid binding (5,521 unigenes), and  
225 anion binding (5,322 unigenes) (Fig 1).

226

227 **Table 4. Annotation statistics of 159 130 Unigenes on *F. chinensis*.**

228

| Database   | No. of unigenes | % of total |
|------------|-----------------|------------|
| GO         | 16,578          | 10.42%     |
| KEGG       | 13,975          | 8.78%      |
| NR         | 22,256          | 13.99%     |
| PFAM       | 13,360          | 8.40%      |
| STRING     | 17,325          | 10.89%     |
| SWISS-PROT | 16,700          | 10.49%     |
| Average    | 16,699          | 10.50%     |

229

## 230 **DEG identification and enrichment**

231 We identified 3,658 unigenes as DEGs (i.e.,  $|\log_2FC| > 1$  and  $FDR < 0.05$ ). Of

232 these, 1,755 were downregulated in the LS group as compared to the control, and  
233 1,903 were upregulated (Fig 2). We identified 38 KEGG pathways as significantly  
234 enriched in the 3,658 DEGs ( $P < 0.05$ , Fig 3). Of these, 13 were metabolic pathways,  
235 including tryptophan metabolism, lysine degradation, drug metabolism-cytochrome  
236 P450, and tyrosine metabolism; 13 were organismal systems pathways, including  
237 salivary secretion, insulin secretion, proximal tubule bicarbonate reclamation, and the  
238 TOLL and IMD signaling pathways; and two were cellular process pathways, namely  
239 phagosome and regulation of the actin cytoskeleton (Fig 3). The remaining 10  
240 pathways were associated with environmental information processing, drug  
241 development, and human diseases (Fig 3). Across all 38 pathways, three were  
242 potentially related to osmoregulation: mineral absorption (ko04978), four DEGs;  
243 vasopressin-regulated water reabsorption (KEGG: ko04962), three DEGs; and  
244 ribosome (ko03010), 29 DEGs (Table 5). The DEGs in these pathways included  
245 *ATPIA* (Sodium/potassium-transporting ATPase subunit alpha), *CLCN2* (Chloride  
246 channel 2), *VAMP2* (Vesicle-associated membrane protein 2), and *AQP4*  
247 (Aquaporin-4), *HMOX2* (Heme oxygenase 2), *SLC40A1/FPN1* (Solute carrier family  
248 40 (iron-regulated transporter), member 1), *RAB5* (Ras-related protein Rab-5), etc.  
249 (Table 5).

250

251 **Table 5. Unigenes in osmoregulation-related pathways differentially expressed in**

252 **response to low salinity.** OS: Organismal Systems; GIP: Genetic Information Processing

| Gene Symbol | Up/Down-regulation (log <sub>2</sub> FC), LS | Description | KEGG ID |
|-------------|----------------------------------------------|-------------|---------|
|-------------|----------------------------------------------|-------------|---------|

| vs Control                                                         |                          |                                                                 |        |        |
|--------------------------------------------------------------------|--------------------------|-----------------------------------------------------------------|--------|--------|
| <b>Mineral absorption-KEGG pathway (OS)</b>                        |                          |                                                                 |        |        |
| <i>ATP1A</i>                                                       | Upregulated<br>(2.49)    | Sodium/potassium-transporting subunit alpha                     | ATPase | ATPase |
| <i>CLCN2</i>                                                       | Upregulated<br>(1.87)    | Chloride channel 2                                              |        | ClC-2  |
| <i>HMOX2</i>                                                       | Upregulated<br>(1.10)    | Heme oxygenase 2                                                |        | HMOX   |
| <i>SLC40A1/FPN1</i>                                                | Downregulated<br>(-1.18) | Solute carrier family 40 (iron-regulated transporter), member 1 |        | FPN1   |
| <b>Vasopressin-regulated water reabsorption- KEGG pathway (OS)</b> |                          |                                                                 |        |        |
| <i>AQP4</i>                                                        | Downregulated<br>(-1.14) | Aquaporin-4;                                                    |        | AQP4   |
| <i>RAB5</i>                                                        | Downregulated<br>(-1.26) | Ras-related protein Rab-5                                       |        | Rab5   |
| <i>VAMP2</i>                                                       | Downregulated<br>(-1.20) | Vesicle-associated membrane protein 2                           |        | VAMP2  |
| <b>Ribosome- KEGG pathway (GIP)</b>                                |                          |                                                                 |        |        |
| <i>RP-L40e</i>                                                     | Upregulated<br>(1.30)    | Large subunit ribosomal protein L40e                            |        | L40e   |
| <i>RP-L36</i>                                                      | Upregulated<br>(1.22)    | Large subunit ribosomal protein L36e                            |        | L36e   |
| <i>RP-L7</i>                                                       | Upregulated<br>(1.21)    | Large subunit ribosomal protein L7/L12                          |        | L7/L12 |
| <i>RP-S3e</i>                                                      | Downregulated<br>(-1.10) | Small subunit ribosomal protein S3e                             |        | S3e    |
| <i>RP-S4e</i>                                                      | Downregulated<br>(-1.03) | Small subunit ribosomal protein S4e                             |        | S4e    |
| <i>RP-S9</i>                                                       | Downregulated<br>(-1.57) | Small subunit ribosomal protein S9                              |        | S9     |
| <i>RP-S14e</i>                                                     | Downregulated<br>(-1.06) | Small subunit ribosomal protein S14e                            |        | S14e   |
| <i>RP-S15e</i>                                                     | Downregulated<br>(-1.13) | Small subunit ribosomal protein S15e                            |        | S15e   |
| <i>RP-S15Ae</i>                                                    | Downregulated<br>(-1.20) | Small subunit ribosomal protein S15Ae                           |        | S15Ae  |
| <i>RP-S19e</i>                                                     | Downregulated<br>(-1.07) | Small subunit ribosomal protein S19e                            |        | S19e   |
| <i>RP-S21e</i>                                                     | Downregulated<br>(-1.38) | Small subunit ribosomal protein S21e                            |        | S21e   |
| <i>RP-S23e</i>                                                     | Downregulated<br>(-1.06) | Small subunit ribosomal protein S23e                            |        | S23e   |
| <i>RP-S27e</i>                                                     | Downregulated<br>(-1.24) | Small subunit ribosomal protein S27e                            |        | S27e   |

|                 |                          |                                       |       |
|-----------------|--------------------------|---------------------------------------|-------|
| <i>RP-S29e</i>  | Downregulated<br>(-1.06) | Small subunit ribosomal protein S29e  | S29e  |
| <i>RP-L5e</i>   | Downregulated<br>(-1.10) | Large subunit ribosomal protein L5e   | L5e   |
| <i>RP-L7e</i>   | Downregulated<br>(-1.05) | Large subunit ribosomal protein L7e   | L7e   |
| <i>RP-L9e</i>   | Downregulated<br>(-1.27) | Large subunit ribosomal protein L9e   | L9e   |
| <i>RP-L10Ae</i> | Downregulated<br>(-1.15) | Large subunit ribosomal protein L10Ae | L10Ae |
| <i>RP-L13e</i>  | Downregulated<br>(-2.71) | Large subunit ribosomal protein L13e  | L13e  |
| <i>RP-L14e</i>  | Downregulated<br>(-1.00) | Large subunit ribosomal protein L14e  | L14e  |
| <i>RP-L17e</i>  | Downregulated<br>(-1.10) | Large subunit ribosomal protein L17e  | L17e  |
| <i>RP-L18e</i>  | Downregulated<br>(-1.40) | Large subunit ribosomal protein L18e  | L18e  |
| <i>RP-L21e</i>  | Downregulated<br>(-1.07) | Large subunit ribosomal protein L21e  | L21e  |
| <i>RP-L23e</i>  | Downregulated<br>(-2.59) | Large subunit ribosomal protein L23e  | L23e  |
| <i>RP-L28e</i>  | Downregulated<br>(-1.07) | Large subunit ribosomal protein L28e  | L28e  |
| <i>RP-L29e</i>  | Downregulated<br>(-1.02) | Large subunit ribosomal protein L29e  | L29e  |
| <i>RP-L31e</i>  | Downregulated<br>(-1.11) | Large subunit ribosomal protein L31e  | L31e  |
| <i>RP-L35Ae</i> | Downregulated<br>(-1.12) | Large subunit ribosomal protein L35Ae | L35Ae |
| <i>RP-L35e</i>  | Downregulated<br>(-1.10) | Large subunit ribosomal protein L35e  | L35e  |
| <i>RP-L37Ae</i> | Downregulated<br>(-1.92) | Large subunit ribosomal protein L37Ae | L37Ae |
| <i>RP-L37e</i>  | Downregulated<br>(-1.04) | Large subunit ribosomal protein L37e  | L37e  |

---

253

## 254 **RT-qPCR verification**

255 We used RT-qPCR to verify four DEGs: two DEGs from osmoregulation-related  
256 pathways (*ATPIA* and *CLCN2*; Table 5) and two random DEGs in other pathways

257 (*HK* and *glyA*). Consistent with the RNA-seq results, RT-qPCR identified *ATP1A*,  
258 *CLCN2*, and *HK* (hexokinase) as significantly upregulated in the LS group as  
259 compared to the control ( $|\log_2FC| > 1$  and  $FDR < 0.05$ ; Fig 4). Although *glyA* (glycine  
260 hydroxymethyltransferase) was not significantly downregulated between the LS and  
261 control groups in the qRT-PCR analysis, this gene had similar patterns of expression  
262 in both the qRT-PCR and the RNA-Seq analyses (Fig 4).

## 263 **Discussion**

### 264 **Assembly quality and GO classification**

265 The *F. chinensis* transcriptome assembled in this study had an N50 of 1,004 bp,  
266 which was similar to, but slightly better than, those previously obtained for *P.*  
267 *vannamei* (448 bp; [23]) and *Oratosquilla oratoria* (798 bp; [45]). This indicated that  
268 our assembly was of acceptable quality. Consistent with previous studies of  
269 osmoregulation ([23-24]), the unigenes identified in this study were primarily  
270 associated with cation binding, macromolecule metabolic process, and organonitrogen  
271 compound metabolic process. This suggested that genes with functions in these  
272 categories are potentially important to adaptation to low-salinity environments. The  
273 result also partially supports the finding from Yuan (2017), who showed that 15.02 %  
274 and 16.24 % of positively selected genes in seawater and freshwater shrimps,  
275 respectively, enriched in the functions of cation binding; 22.71% and 18.80%  
276 positively selected genes in seawater and freshwater shrimps, respectively, enriched in  
277 the functions of cellular macromolecule metabolic process [46]. In their study,  
278 however, no specific and osmoregulation-related data for *F. chinensis* is available,

279 thus genes used in this study are not identical compared to that in their study. Whether  
280 unigenes enriched in other GO terms mentioned by this study (Fig 1) have positive  
281 selection sites to adapt the low-salinity environments, which is another question to  
282 answer in future.

## 283 **DEGs and pathways adapted to low salinity**

284 Minerals not only serve as nutrients, but also are essential components of  
285 osmoregulation for crustaceans [3]. In the LS group, three genes in the mineral  
286 absorption pathway (ko04978) were differentially expressed as compared to the  
287 control: three were upregulated (*ATPIA*, *CLCN2*, and *HMOX2*), and one was  
288 downregulated (*SLC40A1/FPNI*; Table 5). Of these, *ATPIA*, *CLCN2*, and  
289 *SLC40A/FPNI* encode channel transporter proteins, while *HMOX2* encodes an  
290 intracellular protein. Our identification of these DEGs in this important pathway  
291 suggested that they may play a role in osmoregulation in response to low-salinity  
292 exposure.

293 *ATPIA* is involved in encoding a  $\text{Na}^+/\text{K}^+$ -ATPase that controls the movements of  
294 the  $\text{Na}^+$  and  $\text{K}^+$  ions between the hemolymph and the intracellular fluid [1]. The  
295 upregulation of  $\text{Na}^+/\text{K}^+$ -ATPase on the basolateral membrane causes more  $\text{Na}^+$  ions to  
296 be transported out than  $\text{K}^+$  ions taken in [47]. The upregulation of the chloride channel  
297 protein (encoded by *CLCN2*) has a similar effect on osmoregulation, increasing the  
298 amount of  $\text{Cl}^-$  leaving the cell and entering the hemolymph space. This process thus  
299 facilitates the rapid adaptation of *F. chinensis* to low-salinity environments by  
300 increasing salt concentration in hemolymph [1]. Indeed, previous studies have shown



301 that *F. chinensis* hemolymph is hyperosmotic to the external medium at low salinities  
302 (e.g., 5 ppt) [10, 30]. On this point, the results support the opinion reviewed by  
303 Péqueux (1995) and Henry (2012) that osmoregulators in low-salinity environment  
304 (below 26 ppt) will turn on mechanisms of anisomotic extracellular regulation to  
305 stabilize hemolymph osmotic and ionic concentrations [1, 3]. Although the control  
306 group (20 ppt) is already in low-salinity environment according to reference salinity  
307 of 26 ppt, the result has implied that the salinity difference between 5 ppt and 20 ppt  
308 is too huge enough to make their gene expression difference, as well as the  
309 hemolymph osmolality [21].

310 We also observed that two genes associated with iron levels were differentially  
311 expressed in the LS group as compared to the control: *HMOX2*, which encodes heme  
312 oxygenase 2, was upregulated, and *SLC40A1/FPN1*, which encodes an iron-regulated  
313 transporter, was downregulated. The differential expression of these genes may lead  
314 to the increased production of ferrous irons and reduced iron outflow (ko04978) in the  
315 LS group. A previous study had showed that the decreased iron concentration in blood  
316 of *Cacinus maenas* was associated with their adaptation to osmotic stress [48]. The  
317 downregulation of the iron-regulated transporter (DIRT) in this study has provided a  
318 new interpretation that how the iron concentration in blood was decreased at the  
319 molecular level. Besides the crustaceans, the DIRT even occurred in fish species like  
320 steelhead trout (*Oncorhynchus mykiss*). However, fewer reports clearly showed the  
321 function of the iron in osmoregulation [48-49]. Decreasing blood iron concentration in  
322 crustaceans under salinity stress was interpreted by the sortation of iron from blood to

323 other tissues [48]. Moreover, extreme salinity stress will generates an increase in the  
324 ROS (reactive oxygen species) which is harmful to crustaceans [3]. Iron in tissues  
325 plays a role in oxidative metabolism by the form of a key competent in cytochromes  
326 and enzymes [50]. Thus, taken together, it may be the way for *F. chinensis* in low  
327 salinity in response to salinity stress that the iron in gill cells is prone to be used for  
328 synthesis of bio-molecules (cytochromes and enzymes) involved in oxidative  
329 metabolism.

330 In addition regulating salt and mineral levels, crustaceans maintain an  
331 approximately constant osmotic concentration of extracellular fluid (hemolymph)  
332 regardless of the salinity of the surrounding medium, by regulating water flow in and  
333 out of the hemolymph [1]. Here, three unigenes in the vasopressin-regulated water  
334 reabsorption pathway (ko04962; *AQP4*, *VAMP2*, and *RAB5*) were downregulated in  
335 the LS group. We expect that this downregulation will reduce water inflow to the  
336 hemolymph, helping to maintain a constant osmotic concentration. In particular,  
337 because the primary function of AQP4 is to transport water across the plasma  
338 membrane into hemolymph [19, 51], thus, the downregulation of the *AQP4* gene will  
339 facilitate reduction of hemodilution. Similarly, the downregulation of *VAMP2* will  
340 strongly inhibit AQP2 fusion at the apical membrane, which has been shown to  
341 decrease water flow into the hemolymph in vertebrates [18, 52]. Finally, the  
342 downregulation of *RAB5* may also inhibit the fusion of AQP2 at the endosomal apical  
343 membrane; RAB5 is also one of the components implicated in early endosome fusion  
344 [53], particularly, which is predicted to be involved in the regulation of AQP2

345 trafficking to and from the plasma membrane [54]. Thus, this study reports, for the  
346 first time, that the genes (*AQP4*, *VAMP2*, and *RAB5*) are associated with the reduction  
347 of water-permeability in *F. chinensis* in response to low-salinity environments.

348 In the study, we expected that the allostatic load on *F. chinensis* would increase  
349 when salinity decreased from 20 ppt to 5 ppt. All forms of allostasis require energy, as  
350 allostatic load increases, the amount of energy available for other biological functions  
351 decreases [6, 21, 23, 25, 55]. We found that most of the DEGs in the ribosome  
352 pathway (ko03010) were downregulated in the LS group as compared to the control  
353 (Table 5). Ribosome is the location of polypeptide synthesis. Downregulation of the  
354 structural macromolecular components in ribosome could decrease polypeptide  
355 synthesis. The previous study showed proteins L4, L22, L39e, L19, L23, L24, L29  
356 and L31e are important to polypeptide synthesis [56]. Downregulation of these genes  
357 in this study implies the synthesis of proteins will be affected in *F. chinensis* exposed  
358 to low salinities. Notably, it seems that proteins not involved in low-salinity resistance  
359 more likely decrease, concomitant with the diversion of energy resources to  
360 osmoregulation. Similarly, *P. vannamei* subjected to chronic low-salinity stress  
361 upregulated the expression of AMP-activated protein kinase (AMPK) to maintain  
362 energy balance by increasing catabolism to generate ATP and decreasing anabolism to  
363 conserve ATP [57]. However, *AMPK* was not significantly differentially expressed in  
364 *F. chinensis*. This suggested that, unlike *P. vannamei* (another common shrimp  
365 species cultured in China), *F. chinensis* may not have a strong ability to adapt to  
366 low-salinity conditions in maintaining energy balance. Otherwise, another evidence

367 implying the weaker adaption of *F. chinensis* to low salinity compared to *P. vannamei*  
368 can be found in studies from Tang (2016) and Li (2019b) [21, 26]. Hemolymph  
369 osmolality of *F. chinensis* was significantly reduced when salinity decreased from 15  
370 ppt to 10 ppt [21], while that of *P. vannamei* did not significantly reduced even when  
371 environmental salinity decreased from 12 ppt to 0 ppt [26]. Thus, successfully  
372 low-salinity aquaculture of *F. chinensis* deserves more attention.

373 In this study, we used two different salinities to identify DEGs potentially  
374 associated with the response of *F. chinensis* to low salinity. Because we only  
375 compared two salinities, our results do not reflect the adaptation process. To better  
376 understand the mechanisms associated with gradual or continuous changes in salinity,  
377 we aim to investigate the responses of this species to additional salinities in future  
378 studies, using both RNA-Seq and RT-qPCR.

379 In summary, our results indicated that four unigenes in the mineral absorption  
380 pathway (*ATPIA*, *CLCN2*, *HMOX2*, and *SLC40A1/FPN1*), as well as three unigenes  
381 in the vasopressin-regulated water reabsorption pathway (*AQP4*, *VAMP2*, and *RAB5*),  
382 were differentially expressed in *F. chinensis* in response to low-salinity exposure.  
383 These pathways, in conjunction with the ribosome pathway, may be important for  
384 osmoregulation in *F. chinensis* under low-salinity conditions. Although the associated  
385 mechanisms require further investigation, our results help to clarify the molecular  
386 responses of *F. chinensis* to low-salinity environments. This study suggests that *F.*  
387 *chinensis* could be an evolutionary model of weak osmoregulator, combining with  
388 patterns of hemolymph osmoregulation (include the strong osmoregulator, weak

389 osmoregulator and osmoconformer, etc.) in aquatic crustaceans viewed by Péqueux  
390 (1995) [1].

## 391 **Data Availability Statement**

392 The raw data have been uploaded to SRA database (PRJNA669213).

## 393 **Funding**

394 The work was funded by Natural Science Foundation of the Jiangsu Higher  
395 Education Institutions of China (19KJD180001); and sponsored by “Qing Lan Project  
396 of Jiangsu Province of China”; Young Talents Support Program in Lianyungang  
397 Normal College (LSZQNXM201702); Open Foundation of Jiangsu Key Laboratory  
398 for Bioresources of Saline Soils (JKLBS2016008).

## 399 **Acknowledgements**

400 We thank LetPub ([www.letpub.com](http://www.letpub.com)) for its linguistic assistance and scientific  
401 consultation during the preparation of this manuscript.

## 402 **Author Contributions**

403 **Data curation:** Lei Zhang, Zhengfei Wang.

404 **Funding acquisition:** Jun Liu.

405 **Resources:** Shiguang Shao, Lei Zhang.

406 **Writing – original draft:** Jun Liu, Jie Shen.

407 **Writing – review & editing:** Jun Liu, Jie Shen, Daizhen Zhang.

## 408 **Competing Interests**

409 The authors have declared that no competing interests exist.

410

411

## 412 **References**

- 413 1. Péqueux A. Osmotic regulation in crustaceans. *Journal of Crustacean Biology*.  
414 1995; 15(1): 1-60. <https://doi.org/10.2307/1549010>
- 415 2. Foster C, Amado EM, Souza MM, Freire CA. Do osmoregulators have lower  
416 capacity of muscle water regulation than osmoconformers? A study on decapod  
417 crustaceans. *Journal of Experimental Zoology Part A: Ecological Genetics and*  
418 *Physiology*. 2010; 313A(2): 80-94. <https://doi.org/10.1002/jez.575>
- 419 3. Henry RP, Lucu C, Onken H, Weihrauch D. Multiple functions of the crustacean  
420 gill: osmotic/ionic regulation, acid-base balance, ammonia excretion, and  
421 bioaccumulation of toxic metals. *Frontiers in physiology*. 2012; 3: 1-33.  
422 <https://doi.org/10.3389/fphys.2012.00431>
- 423 4. McNamara JC, Faria SC. Evolution of osmoregulatory patterns and gill ion  
424 transport mechanisms in the decapod Crustacea: a review. *Journal of*  
425 *Comparative Physiology B: Biochemical, Systemic & Environmental Physiology*.  
426 2012; 182(8): 997-1014. <https://doi.org/10.1007/s00360-012-0665-8>
- 427 5. Henry RP. Environmentally mediated carbonic anhydrase induction in the gills of  
428 euryhaline crustaceans. *The Journal of Experimental Biology*. 2001; 204(5):  
429 991-1002.
- 430 6. Sundell K, Wrange AL, Jonsson PR, Blomberg A. Osmoregulation in barnacles:  
431 An evolutionary perspective of potential mechanisms and future research  
432 directions. *Frontiers in Physiology*. 2019; 10: 877.  
433 <https://doi.org/10.3389/fphys.2019.00877>
- 434 7. Li E, Chen L, Zeng C, Yu N, Xiong Z, Chen X, et al. Comparison of digestive and  
435 antioxidant enzymes activities, haemolymph oxyhemocyanin contents and

- 436 hepatopancreas histology of white shrimp, *Litopenaeus vannamei*, at various  
437 salinities. *Aquaculture*, 2008; 274(1): 80-86.  
438 <https://doi.org/10.1016/j.aquaculture.2007.11.001>
- 439 **8.** Bonilla-Gómez JL, Chiappa-Carrara X, Galindo C, Jeronimo G, Cuzon G, Gaxiola  
440 G. Physiological and biochemical changes of wild and cultivated juvenile pink  
441 shrimp *Farfantepenaeus duorarum* (Crustacea: Penaeidae) during molt cycle.  
442 *Journal of Crustacean Biology*. 2012; 32(4): 597-606. [https://doi.org/](https://doi.org/10.1163/193724012X630679)  
443 [10.1163/193724012X630679](https://doi.org/10.1163/193724012X630679)
- 444 **9.** Havird JC, Mitchell RT, Henry RP, Santos SR. Salinity-induced changes in gene  
445 expression from anterior and posterior gills of *Callinectes sapidus* (Crustacea:  
446 Portunidae) with implications for crustacean ecological genomics. *Comparative*  
447 *Biochemistry and Physiology Part D: Genomics and Proteomics*. 2016; 19(C),  
448 34-44. <https://doi.org/10.1016/j.cbd.2016.06.002>
- 449 **10.** Li J, Li W, Zhang X. Effects of dissolved oxygen, starvation, temperature, and  
450 salinity on the locomotive ability of juvenile Chinese shrimp *Fenneropenaeus*  
451 *chinensis*. *Ethology Ecology & Evolution*. 2019a; 31(2): 155-172.  
452 <https://doi.org/10.1080/03949370.2018.1526215>
- 453 **11.** Cameron JN, Batterton CV. Antennal gland function in the freshwater bluecrab,  
454 *Callinectes sapidus*: water, electrolyte, acid-base and ammonia excretion. *Journal*  
455 *of Comparative Physiology*. 1978a; 123: 143-148.  
456 <https://doi.org/10.1007/BF00687842>
- 457 **12.** Cameron JN, Batterton CV. Temperature and blood acid-base status in the blue  
458 crab, *Callinectes sapidus*. *Respiration physiology*. 1978b; 35(2): 101-110.  
459 [https://doi.org/10.1016/0034-5687\(78\)90015-4](https://doi.org/10.1016/0034-5687(78)90015-4) PMID: 33428
- 460 **13.** Neufeld GJ, Pritchard JB. Osmoregulation and gill Na, K-ATPase in the rock crab,

- 461 *Cancer irroratus*: response to DDT. Comparative biochemistry and physiology.  
462 C: Comparative pharmacology. 1979; 62c(2): 165-172. [https://doi.org/](https://doi.org/10.1016/0306-4492(79)90005-4)  
463 10.1016/0306-4492(79)90005-4
- 464 **14.** Henry RP, Cameron JN. The distribution and partial characterization of carbonic  
465 anhydrase in selected aquatic and terrestrial decapod crustaceans. Journal of  
466 Experimental Zoology. 1982; 221: 309-321. [https://doi.org/](https://doi.org/10.1002/jez.1402210306)  
467 10.1002/jez.1402210306
- 468 **15.** Varley DG, Greenaway P. Nitrogenous excretion in the terrestrial carnivorous  
469 crab *geograpsus grayi*: site and mechanism of excretion. The Journal of  
470 Experimental Biology. 1994; 190(1): 179-193.
- 471 **16.** Chung JS, Maurer L, Bratcher M, Pitula JS, Ogburn MB. Cloning of aquaporin-1  
472 of the blue crab, *Callinectes sapidus*: its expression during the larval  
473 development in hyposalinity. Aquatic Biosystems. 2012; 8(1), 21.  
474 <https://doi.org/10.1186/2046-9063-8-21>
- 475 **17.** Nejsum LN, Zelenina M, Aperia A, Frokiaer J, Nielsen S. Bidirectional regulation  
476 of AQP2 trafficking and recycling: involvement of AQP2-S256 phosphorylation.  
477 American Journal of Physiology: Renal Physiology. 2005; 288: F930-F938.  
478 <https://doi.org/10.1152/ajprenal.00291.2004>
- 479 **18.** Campbell EM, Ball A, Hoppler S, Bowman AS. Invertebrate aquaporins: a review.  
480 Journal of Comparative Physiology B: Biochemical, Systemic, and  
481 Environmental Physiology. 2008; 178(8): 935-955.  
482 <https://doi.org/10.1007/s00360-008-0288-2>
- 483 **19.** Ishibashi K, Sasaki S. Aquaporin water channels in mammals. Clinical and  
484 Experimental Nephrology. 1997; 1(4): 247-253.  
485 <https://doi.org/10.1007/BF02480636>



- 486 **20.** Chen JC, Lin JN. Osmolality and chloride concentration in the hemolymph of  
487 subadult *Penaeus chinensis* subjected to different salinity levels. *Aquaculture*.  
488 1994; 125(1-2): 167-174. [https://doi.org/10.1016/0044-8486\(94\)90293-3](https://doi.org/10.1016/0044-8486(94)90293-3)
- 489 **21.** Li J, Xu X, Li W, Zhang X. Linking energy metabolism and locomotor variation  
490 to osmoregulation in Chinese shrimp *Fenneropenaeus chinensis*. *Comparative*  
491 *Biochemistry and Physiology Part - B: Biochemistry and Molecular Biology*.  
492 2019b; 234: 58-67. <https://doi.org/10.1016/j.cbpb.2019.05.006>
- 493 **22.** Péqueux A, Gilles R. NaCl transport in gills and related structures. Part I:  
494 Invertebrates. In: *Advances in Comparative and Environmental Physiology*  
495 (Gerger R, ed.), 1988; pp 2-47. Springer-Verlag, Berlin, Germany.
- 496 **23.** Zhang D, Wang F, Dong S, Lu Y. De novo assembly and transcriptome analysis  
497 of osmoregulation in *Litopenaeus vannamei* under three cultivated conditions  
498 with different salinities. *Gene*. 2016; 578(2): 185-193.  
499 <https://doi.org/10.1016/j.gene.2015.12.026>
- 500 **24.** Zhang D, Liu J, Qi T, Ge B, Liu Q, Jiang S, et al. Comparative transcriptome  
501 analysis of *Eriocheir japonica sinensis* response to environmental salinity. *PLoS*  
502 *ONE*, 2018a; 13(9): e0203280. <https://doi.org/10.1371/journal.pone.0203280>  
503 PMID: 30192896
- 504 **25.** Gao B, Sun D, Lv J, Ren X, Liu P, Li J. Transcriptomic analysis provides insight  
505 into the mechanism of salinity adjustment in swimming crab *Portunus*  
506 *trituberculatus*. *Genes and Genomics*. 2019; 41(8): 961-971.  
507 <https://doi.org/10.1007/s13258-019-00828-4>
- 508 **26.** Tang JZ, Liu Z, Wang XL, Qi SW, Bai LY, Zhang JC, et al. Effects of  
509 desalination on survival rate, osmolality and Na<sup>+</sup> / K<sup>+</sup>-ATPase activity of  
510 *Penaeus vannamei*. *Freshwater Fisheries*. 2016; 46(3): 82-86.

- 511 **27.** Liu B, Yu Z, Song X, Guan Y, Jian X, He J. The effect of acute salinity change on  
512 white spot syndrome (WSS) outbreaks in *Fenneropenaeus chinensis*.  
513 *Aquaculture*. 2006; 253(1-4): 163-170.  
514 <https://doi.org/10.1016/j.aquaculture.2005.08.022>
- 515 **28.** Sen D, Fang W, Hao S, Biao G, Shuanglin D. Effects of salinity fluctuation  
516 frequency on the osmolarity, Na<sup>+</sup>-K<sup>+</sup>-ATPase activity and hsp70 expression in  
517 juvenile chinese shrimp, *Fenneropenaeus chinensis*. *Journal of Ocean University*  
518 *of China*. 2009; 8(1): 71-76. [10.1007/s11802-009-0071-3](https://doi.org/10.1007/s11802-009-0071-3)
- 519 **29.** Pan L, Li L, Zhang L. Variations of ion-transport enzyme activities during early  
520 development of the shrimps *Fenneropenaeus chinensis* and *Marsupenaeus*  
521 *japonicus*. *Journal of Ocean University of China*, 2010; 9(1): 76-80.  
522 <https://doi.org/10.1007/s11802-010-0076-y>
- 523 **30.** Chen JC, Lin MN, Ting YY, Lin JN. Survival, haemolymph osmolality and tissue  
524 water *Penaeus chinensis* juveniles acclimated to different salinity and  
525 temperature levels. *Comparative Biochemistry and Physiology - A Physiology*.  
526 1995; 110(3): 253-258. [https://doi.org/10.1016/0300-9629\(94\)00164-O](https://doi.org/10.1016/0300-9629(94)00164-O)
- 527 **31.** Cock PJA, Fields CJ, Goto N, Heuer ML, Rice PM. The Sanger FASTQ file  
528 format for sequences with quality scores, and the Solexa/Illumina FASTQ  
529 variants. *Nucleic Acids Research*. 2010; 38(6): 1767-1771.  
530 <https://doi.org/10.1093/nar/gkp1137> PMID: 20015970
- 531 **32.** Martin M. Cutadapt removes adapter sequences from high-throughput sequencing  
532 reads. *Embnet Journal*, 2011; 17: 10-12. <https://doi.org/10.14806/ej.17.1.200>
- 533 **33.** Haas BJ, Papanicolaou A, Yassour M, Grabherr M, Blood PD, Bowden J, et al.  
534 De novo transcript sequence reconstruction from RNA-seq using the Trinity  
535 platform for reference generation and analysis. *Nature Protocols*. 2013; 8(8):

- 536 1494-512. <https://doi.org/10.1038/nprot.2013.084>
- 537 **34.** Nadia M, Davidson AO. Corset: enabling differential gene expression analysis for  
538 de novo assembled transcriptomes. *Genome Biology*. 2014; 15(7): 410.  
539 <https://doi.org/10.1186/s13059-014-0410-6>
- 540 **35.** Altschul SF, Gish W, Miller W, Myers EW, Lipmanl DJ. Basic local alignment  
541 search tool. *Journal of Molecular Biology*. 1990; 215(3): 403-410.  
542 [https://doi.org/10.1016/S0022-2836\(05\)80360-2](https://doi.org/10.1016/S0022-2836(05)80360-2)
- 543 **36.** Conesa A, Gotz S, Garcia-Gomez JM, Terol J, Talon M, Rob-les M. Blast2GO: a  
544 universal tool for annotation, visualization and analysis in functional genomics  
545 research. *Bioinformatics*. 2005; 21(18): 3674-3676.  
546 <https://doi.org/10.1093/bioinformatics/bti610>
- 547 **37.** Li B, Dewey CN. RSEM: accurate transcript quantification from RNA-seq data  
548 with or without a reference genome. *BMC Bioinformatics*. 2011; 12(1): 323.  
549 <https://doi.org/10.1186/1471-2105-12-323>
- 550 **38.** Reiner A, Yekutieli D, Benjamini Y. Identifying differentially expressed genes  
551 using false discovery rate controlling procedures. *Bioinformatics*. 2003; 19(3):  
552 368-375. <https://doi.org/10.1093/bioinformatics/btf877>
- 553 **39.** Trapnell C, Hendrickson DG, Sauvageau M, Goff L, Rinn JL, Pachter L.  
554 Differential analysis of gene regulation at transcript resolution with RNA-seq.  
555 *Nature Biotechnology*. 2013; 31(1): 46-53. <https://doi.org/10.1038/nbt.2450>  
556 PMID: 23222703
- 557 **40.** Li Y, Wang X, Li C, Hu S, Yu J, Song S. Transcriptome-wide  
558 n6-methyladenosine profiling of rice callus and leaf reveals the presence of  
559 tissue-specific competitors involved in selective mRNA modification. *RNA*  
560 *Biology*. 2014; 11(9): 1180-1188. <https://doi.org/10.4161/rna.36281>

- 561 **41.** Lalitha S. Primer premier 5. Biotech Software & Internet Report. 2000; 1:  
562 270-272. <https://doi.org/10.1089/152791600459894>
- 563 **42.** Wang S, Wang Y, Wu H, Hu L. Rbp2 induces epithelial-mesenchymal transition  
564 in non-small cell lung cancer. Plos One. 2013; 8(12): e84735.  
565 <https://doi.org/10.1371/journal.pone.0084735>
- 566 **43.** Liao P, Satten GA, Hu YJ. PhredEM: a phred-score-informed genotype-calling  
567 approach for next-generation sequencing studies. Genetic Epidemiology. 2017;  
568 7(5): 1393-1404. <https://doi.org/10.1002/gepi.22048>
- 569 **44.** Miller JR, Koren S, Sutton G. Assembly algorithms for next-generation  
570 sequencing data. Genomics. 2010; 95(6): 315-327.  
571 <https://doi.org/10.1016/j.ygeno.2010.03.001>
- 572 **45.** Zhang D, Liu J, Qi T, Ge B, Wang Z, Jiang S, et al. Transcriptome analysis of  
573 hepatopancreas from the Cr (VI)-stimulated mantis shrimp (*Oratosquilla*  
574 *oratoria*) by illumina paired-end sequencing: Assembly, annotation, and  
575 expression analysis. Journal of Agricultural and Food Chemistry. 2018b; 66(11):  
576 2598-2606. <https://doi.org/10.1021/acs.jafc.7b05074>
- 577 **46.** Yuan J, Zhang X, Liu C, Duan H, Li F, Xiang J. Convergent evolution of the  
578 osmoregulation system in decapod shrimps. Marine Biotechnology. 2017; 19(1):  
579 76-88. <https://doi.org/10.1007/s10126-017-9729-9>
- 580 **47.** Lingrel JB. Na, K-ATPase: isoform structure, function, and expression. Journal of  
581 Bioenergetics & Biomembranes. 1992; 24(3): 263-270.  
582 <https://doi.org/10.1007/BF00768847>
- 583 **48.** Spaargaren DH. Osmotically induced changes in copper and iron concentrations in  
584 three euryhaline crustacean species. Netherlands Journal of Sea Research. 1983;  
585 17: 96-105.

- 586 **49.** Xiong Y, Dong S, Huang M, Li Y, Zhou Y. Growth, osmoregulatory response,  
587 adenine nucleotide contents, and liver transcriptome analysis of steelhead trout  
588 (*Oncorhynchus mykiss*) under different salinity acclimation methods.  
589 *Aquaculture*. 2020; 520: 734937.  
590 <https://doi.org/10.1016/j.aquaculture.2020.734937>
- 591 **50.** King EN. Oxidative activity of crab gill mitochondria as a function of osmotic  
592 concentration. *Comparative Biochemistry and Physiology*. 1966; 17(1): 245-258.  
593 [https://doi.org/10.1016/0010-406X\(66\)90024-7](https://doi.org/10.1016/0010-406X(66)90024-7)
- 594 **51.** Ishibashi K, Hara S, Kondo S. Aquaporin water channels in mammals. *Clinical*  
595 *and Experimental Nephrology*. 2009; 13(4): 107-117.  
596 <https://doi.org/10.1007/BF02480636>
- 597 **52.** Procino G, Barbieri C, Tamma G, De Benedictis L, Pessin JE, Svelto M. et al.  
598 AQP2 exocytosis in the renal collecting duct - involvement of SNARE isoforms  
599 and the regulatory role of Munc18b. *Journal of Cell Science*. 2008; 121(12):  
600 2097-2106. <https://doi.org/10.1242/jcs.022210>
- 601 **53.** Navaroli DM, Bellvé KD, Standley C, Lifshitz LM, Cardia J, Lambright D, et al.  
602 Rabenosyn-5 defines the fate of the transferrin receptor following  
603 clathrin-mediated endocytosis. *Proceedings of the National Academy of Sciences*  
604 *of the United States of America*. 2012; 109(8): E471–E480.  
605 <https://doi.org/10.1073/pnas.1115495109>
- 606 **54.** Procino G, Barbieri C, Carmosino M, Tamma G, Milano S, De Benedictis L, et al.  
607 Fluvastatin modulates renal water reabsorption in vivo through increased AQP2  
608 availability at the apical plasma membrane of collecting duct cells. *Pflügers*  
609 *Archiv - European Journal of Physiology*, 2011; 462(5): 753-766.  
610 <https://doi.org/10.1007/s00424-011-1007-5>

- 611 **55.** Bett C, Vinatea L. Combined effect of body weight, temperature and salinity on  
612 shrimp *Litopenaeus vannamei* oxygen consumption rate. Brazilian Journal of  
613 Oceanography. 2009; 57(4): 305-314.  
614 <https://doi.org/10.1590/S1679-87592009000400005>
- 615 **56.** Nissen P, Hansen J, Ban N, Moore PB, Steitz TA. The structural basis of  
616 ribosome activity in peptide bond synthesis. Science, 2000; 289(5481): 920-930.  
617 <https://doi.org/10.1126/science.289.5481.920>
- 618 **57.** Xu C, Li E, Xu Z, Wang S, Chen K, Wang X, et al. Molecular characterization  
619 and expression of AMP-activated protein kinase in response to low-salinity stress  
620 in the Pacific white shrimp *Litopenaeus vannamei*. Comparative Biochemistry  
621 and Physiology Part - B: Biochemistry and Molecular Biology. 2016; 198:  
622 79-90.  
623

624 **Fig 1.** Gene Ontology (GO) analysis of the unigenes in the *Fenneropenaeus chinensis*  
625 genome, showing the GO terms most overrepresented in the GO categories (A)  
626 biological processes, (B) cellular components, and (C) molecular function. The colors  
627 in each pie chart correspond to GO terms, and the size of each slice represents the  
628 proportion of unigenes associated with each GO term.

629

630 **Fig 2.** Unigene expression patterns. The horizontal and vertical axes present the  
631 expression levels of unigenes in the two groups (TPM, transcripts per kilobase  
632 million, values); each value was logarithmically transformed. DEGs, i.e., unigenes  
633 with expression fold changes  $|\log_2FC| > 1$  and  $FDR < 0.05$ , are marked with red and  
634 blue. Red dots represent unigenes that were significantly upregulated under low  
635 salinity, blue dots represent those that were significantly downregulated under low  
636 salinity, and black dots represent genes that are not DEGs. The greater the deviation  
637 of a dot from the diagonal, the greater the difference in the unigene expression  
638 between the two groups. Dots near 0 represent unigenes with low expression.

639

640 **Fig 3.** KEGG (Kyoto Encyclopedia of Genes and Genomes) pathways significantly  
641 enriched in the DEGs. Each bar represents a pathway, and the height of bar reflects  
642 the enrichment ratio (equal to Sample Number / Background Number). \*:  $FDR <$   
643  $0.05$ , \*\*:  $FDR < 0.01$ .

644

645 **Fig 4.** RT-qPCR verification of four representative genes (*ATP1A*, *CLCN2*, *HK*, and  
646 *glyA*) identified as differentially expressed between low-salinity and control groups of  
647 *Fenneropenaeus chinensis*. \*:  $FDR < 0.05$ . Each bar with standard error represents  
648 three replicates.

(A)

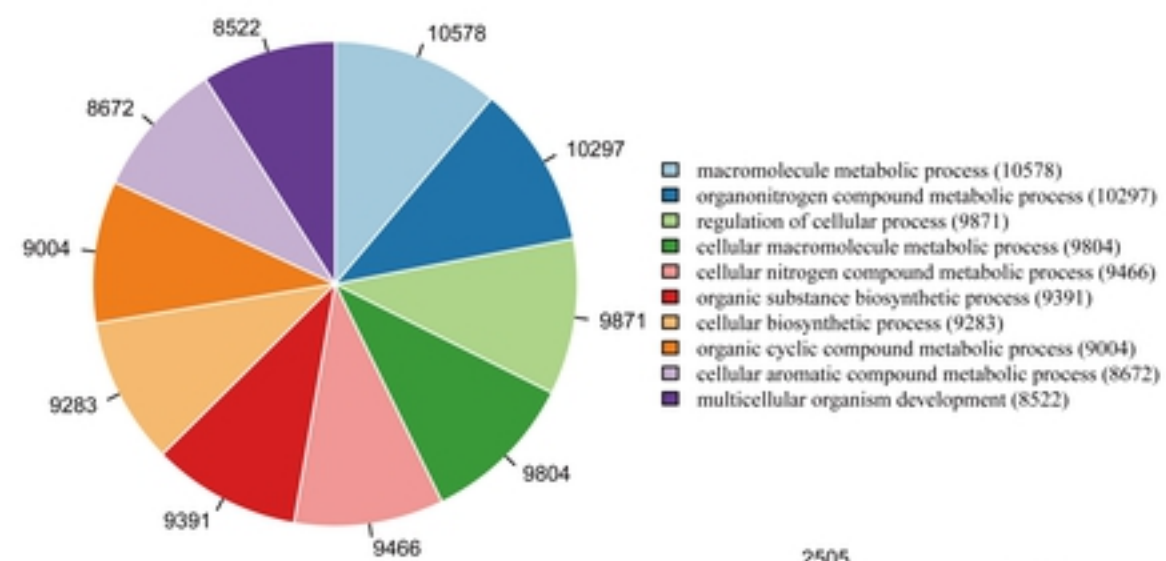

(B)

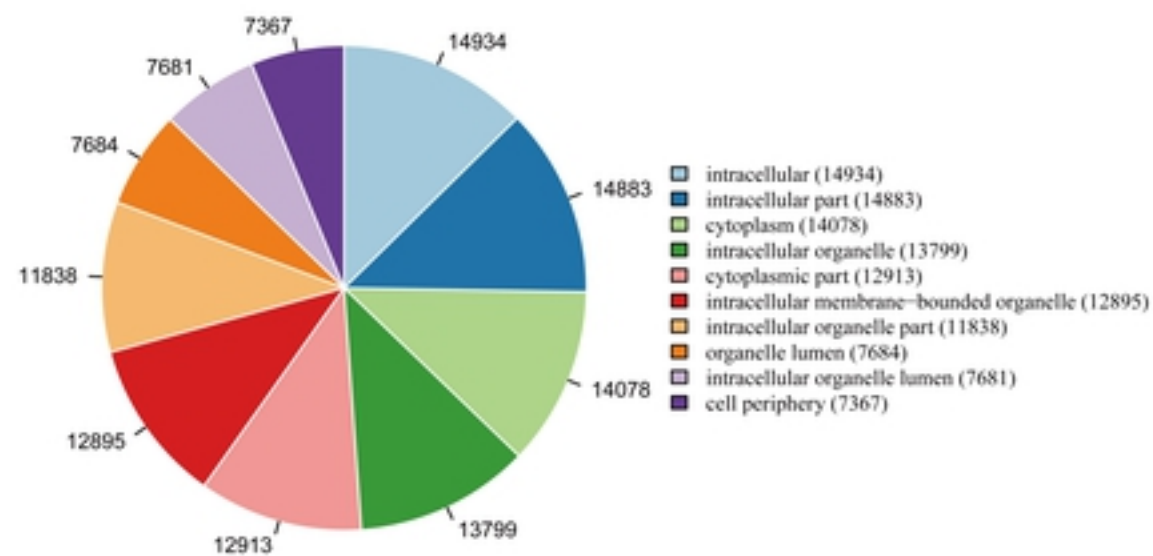

(C)

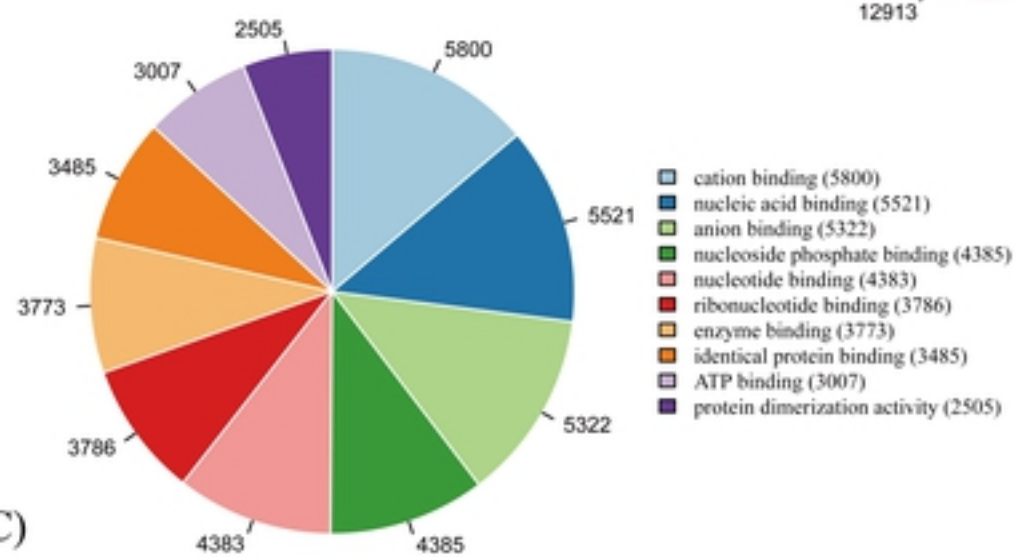

Figure 1



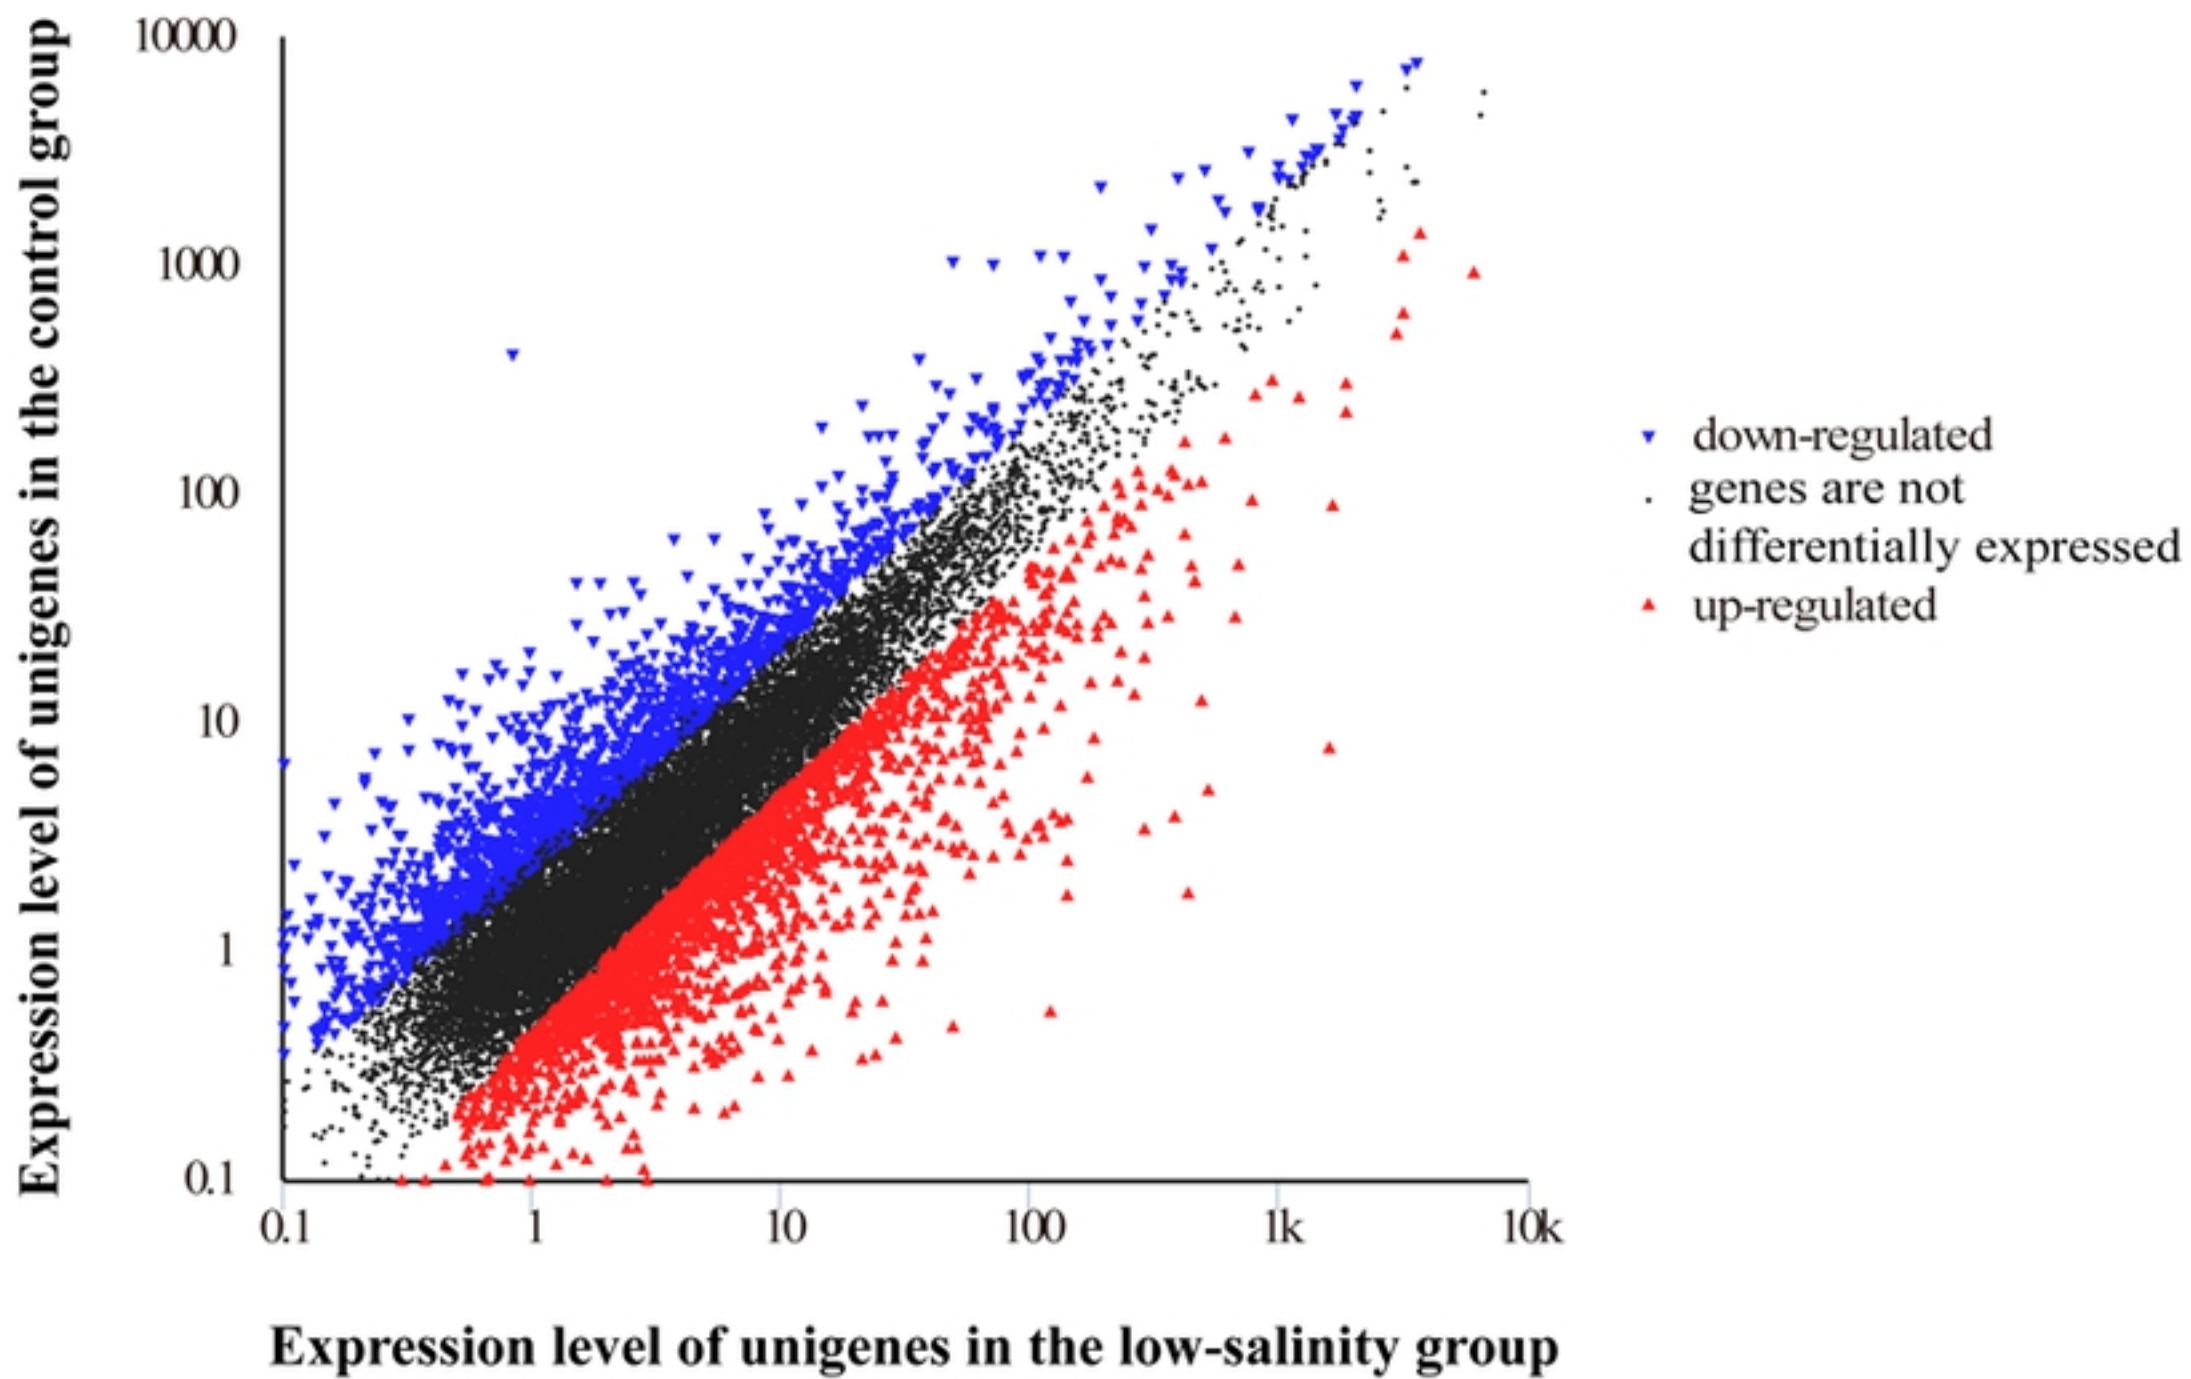

Figure 2

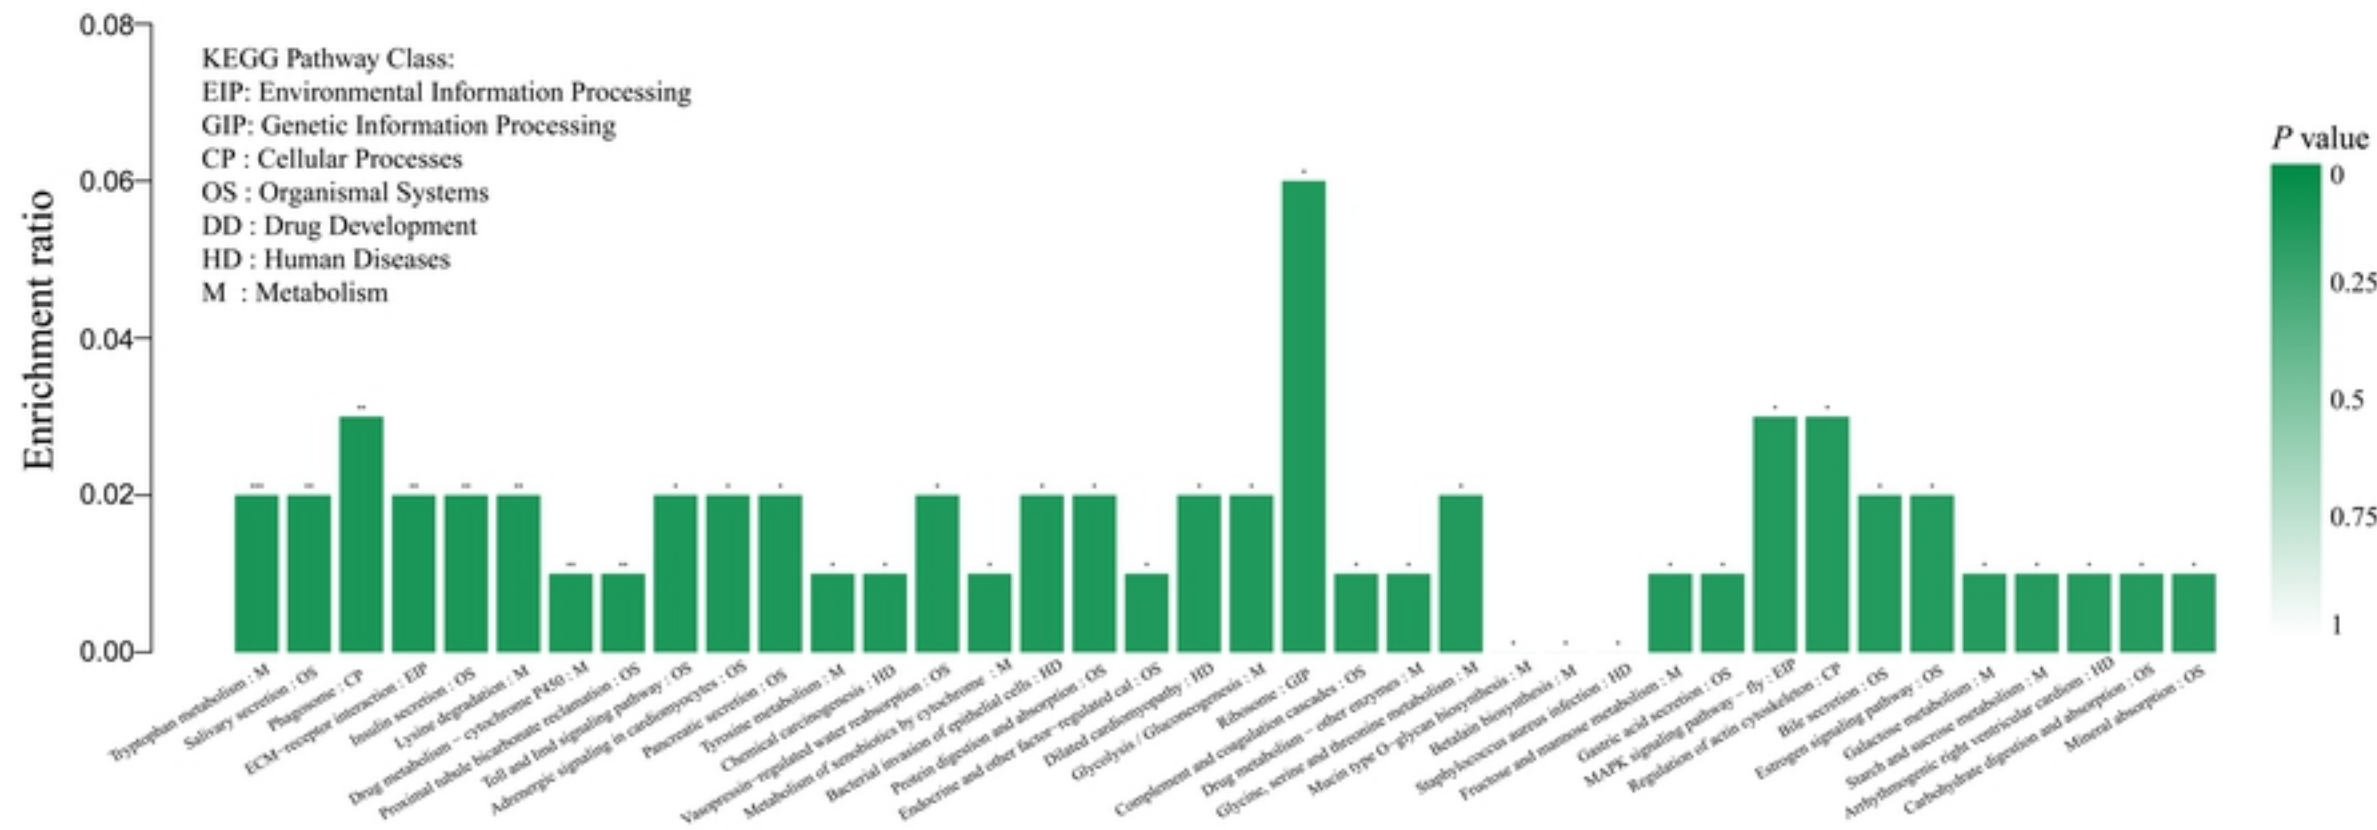

Figure 3

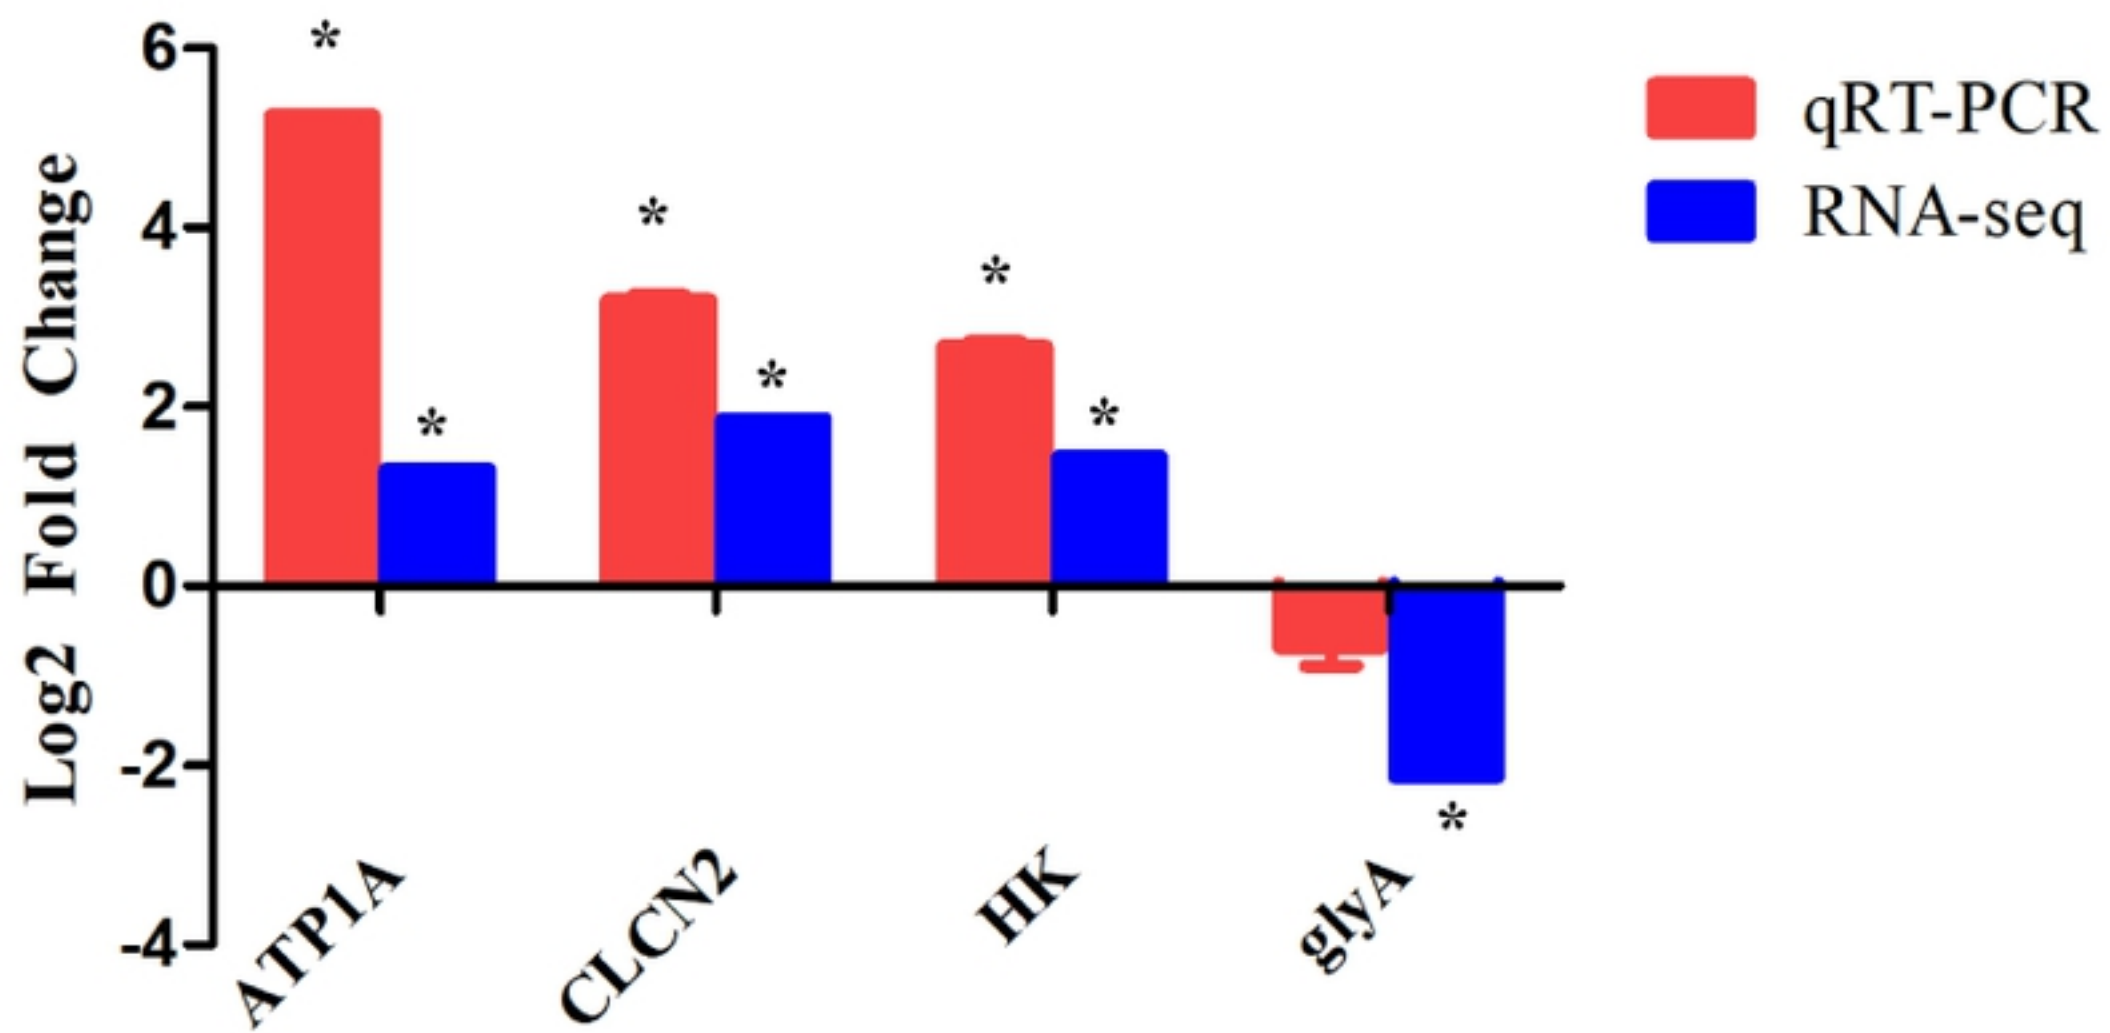

Figure 4
